# Supplementary material
Source: publisher figshare collection journal article supplement (https://acs.figshare.com/ndownloader/files/3584454)
Supplement: Supplementary file 1 [file 3584454]

Supporting Information for

# The Hydrogenation of Carbon Dioxide by Water: Alkali-Promoted Synthesis of Formate

*Friedrich M. Hoffmann<sup>#</sup>, Yixiong Yang<sup>\*&</sup>, Jan Paul<sup>§</sup>, Michael G. White<sup>\*&</sup>, Jan Hrbek<sup>\*^</sup>*

<sup>\*</sup>Chemistry Department, Brookhaven National Laboratory, Upton, NY 11973

<sup>#</sup>Department of Science, BMCC-CUNY, New York, NY 10007

<sup>&</sup>Department of Chemistry, SUNY SB, Stony Brook, NY 11794,

<sup>§</sup>Division of Physics, Lulea University of Technology, 97187 Lulea, Sweden

<sup>^</sup> [hrbek@bnl.gov](mailto:hrbek@bnl.gov)

## EXPERIMENTAL METHOD

Experiments were performed in a three level UHV chamber (base pressure  $2 \times 10^{-10}$  Torr), which contained facilities for IRAS, Low Energy Electron Diffraction, Auger Electron Spectroscopy and TPD. Vibrational spectra were obtained with a Bruker IFS/66v FTIR spectrometer at a resolution of  $4 \text{ cm}^{-1}$  by typically co-adding 100 scans. Potassium was evaporated from a SAES Getter source onto a Cu(111) single crystal surface. A sample mount allowed cooling to 100 K and heating to 1200 K using a programmable temperature controller.  $\text{CO}_2$  and  $\text{H}_2\text{O}$  were introduced by backfilling the UHV chamber to partial pressures of typically  $2 \times 10^{-8}$  Torr each. Details of verifying the

cleanliness of the potassium film and calibration of the film thickness are described in details elsewhere.<sup>17</sup>

Thermal desorption data were collected in a line-of-sight geometry using a heating rate of 2 K/s; we also monitored desorbing species simultaneously with the IRAS data collection during annealing experiments where the sample is not facing the mass spectrometer. In this mode of TPD operation the positions of desorption peaks shifted to lower temperature due to lower heating rate (0.5 K/s vs 2 K/s).

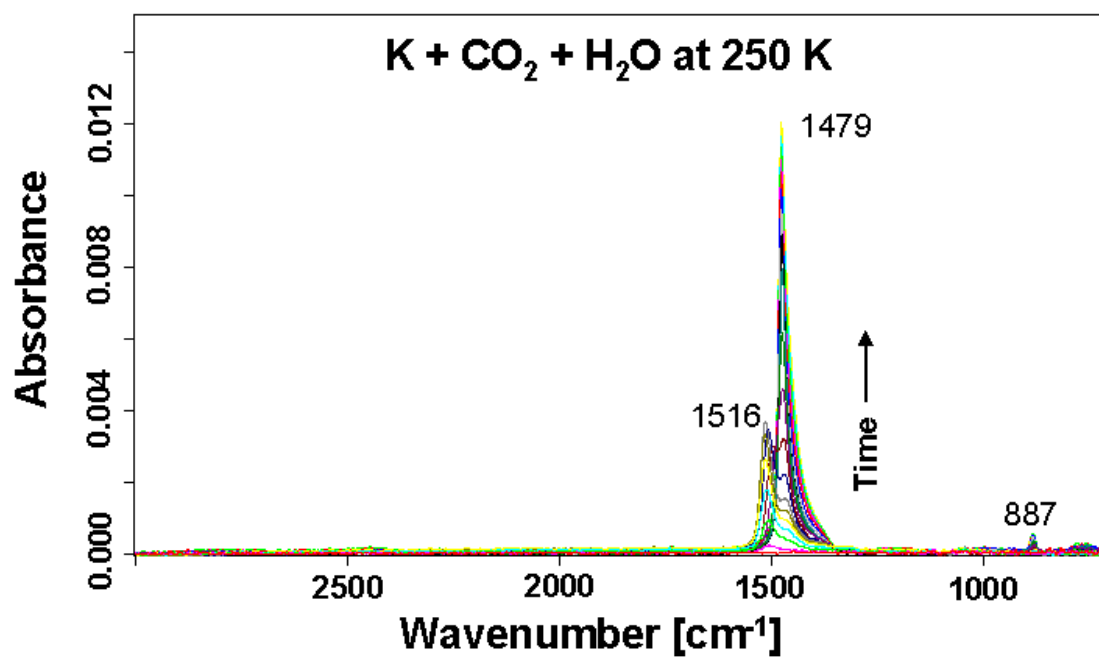

Figure S1: Time-evolved FTIR spectra obtained during the reactive evaporation of potassium in the presence of H<sub>2</sub>O and CO<sub>2</sub> on Cu(111) at 250 K. Spectra have been collected at 50s time intervals, but only every second spectrum is shown. (K-deposition rate: 0.002 ML/s)

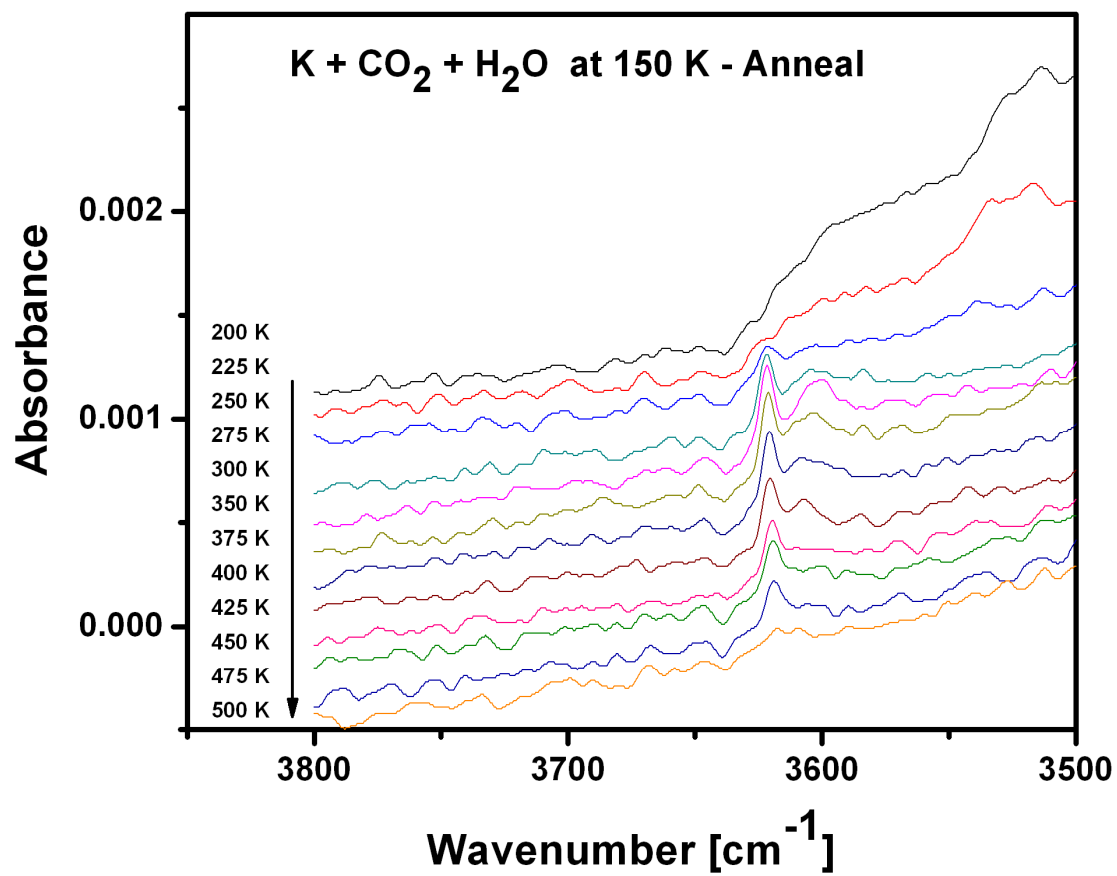

Figure S2: Time-evolved FTIR spectra of formate obtained during annealing from 200 to 500 K with heating rate of 0.5 K/s.

|                      | $C_{2v}$ | Crystalline<br>Bulk HCOOK<br>[cm <sup>-1</sup> ]<br>Ref. (1) | HCOOH /<br>multilayer<br>K/Ru(001)<br>[cm <sup>-1</sup> ]<br>Ref. (2) | HCOOH /<br>multilayer<br>K/Co{101_0}<br>[cm <sup>-1</sup> ]<br>Ref. (3) | HCOOK<br>this work<br>[cm <sup>-1</sup> ] |       |
|----------------------|----------|--------------------------------------------------------------|-----------------------------------------------------------------------|-------------------------------------------------------------------------|-------------------------------------------|-------|
|                      |          |                                                              |                                                                       |                                                                         | 150 K                                     | 250 K |
| $\nu(\text{CH})$     | $A_1$    | 2808                                                         | 2780                                                                  | 2780                                                                    | 2785                                      | 2770  |
| $2\delta(\text{CH})$ |          | 2730                                                         | 2693                                                                  | 2692                                                                    | 2696                                      | 2688  |
| $\nu_a(\text{OCO})$  | $B_1$    | 1597                                                         | 1643                                                                  | 1614 - 1637                                                             | 1619                                      | 1634  |
| $\delta(\text{CH})$  | $B_1$    | 1389                                                         | 1385                                                                  |                                                                         | 1388                                      |       |
| $\nu_s(\text{OCO})$  | $A_1$    | 1357                                                         | 1364                                                                  | 1366                                                                    | 1367                                      | 1361  |
| $\pi(\text{CH})$     | $B_2$    | 1062                                                         | -                                                                     | -                                                                       | -                                         | -     |
| $\delta(\text{OCO})$ | $A_1$    | 772                                                          | 764                                                                   | 764                                                                     | 766                                       | 761   |

Table T1: Vibrational mode assignments of potassium formate

|                         | HCOOK<br>[cm <sup>-1</sup> ]<br>this work | Oxalate C <sub>2</sub> O <sub>4</sub> <sup>2-</sup><br>[cm <sup>-1</sup> ]<br>Ref. (4)      this work |      | Carbonate CO <sub>3</sub> <sup>2-</sup><br>[cm <sup>-1</sup> ]<br>Ref. (5)      this work |      |
|-------------------------|-------------------------------------------|-------------------------------------------------------------------------------------------------------|------|-------------------------------------------------------------------------------------------|------|
| v(CH)                   | 2785                                      |                                                                                                       |      |                                                                                           |      |
| v <sub>a</sub><br>(OCO) | 1619                                      | 1642                                                                                                  | 1665 | 1447                                                                                      | 1460 |
| v <sub>s</sub><br>(OCO) | 1367                                      | 1320                                                                                                  | 1315 | 1071<br>(v.w.)                                                                            | -    |
| π(CO)*                  |                                           |                                                                                                       |      | 884<br>(v.w.)                                                                             | 882  |
| δ(OCO)                  | 766                                       | 768                                                                                                   | 767  | 764                                                                                       | -    |

\* out-of-plane OCO<sub>2</sub> motion = rock      v.w. = very weak

Table T2: Vibrational mode assignments of potassium compounds observed during heating of the multilayer

#### References

- (1) Mentzen, B. F.; Oddon, Y. Coordination Chemistry in Anhydrous Mono-Valent Metallic Formates. 1.The Crystal Structure of Anhydrous Potassium Formate KHCOO-C<sub>2h</sub>-Octahedral Eight-Coordination of the Potassium Atom. *Inorg. Chim. Acta* **1980**, *43*, 237-241.
- (2) Weisel, M. D.; Chen, J. G.; Hoffmann, F. M.; Sun, Y. K.; Weinberg, W. H. A Fourier Transform-Infrared Reflection Absorption-Spectroscopy Study of the Formation and Decomposition of Chemisorbed Formate on Clean and Potassium-Modified Ru(001). *J. Chem. Phys.* **1992**, *97*, 9396-9411.
- (3) Toomes, R. L.; King, D. A. Potassium-promoted Synthesis of Surface Formate and Reactions of Formic Acid on Co{101\_0}. *Surf. Sci.* **1996**, *349*, 43-64.
- (4) Paul, J.; Williams, G. P.; Hoffmann, F. M. Carbon Dioxide Activation and Alkali Compound Formation. 1.Vibrational Characterization of Oxalate Intermediates. *Surf. Sci.* **2003**, *531*, 244-264.
- (5) Hoffmann, F. M.; Weisel, M. D.; Paul, J. The Activation of CO<sub>2</sub> by Potassium-Promoted Ru(001). 1.FT-IRAS and TDMS Study of Oxalate and Carbonate Intermediates. *Surf. Sci.* **1994**, *316*, 277-293.
